# Supplementary material for: A stacked polymer film for robust superhydrophobic fabrics
Source: Royal Society of Chemistry journal article supplement (doi:10.1039/c2py20963b), 2012-12-10
Supplement: c2py20963b.pdf [file c2py20963b.pdf]

## Supplementary Information

### A stacked polymer film for robust superhydrophobic fabrics

Youngmin Yoo,<sup>a</sup> Jae Bem You,<sup>a</sup> Wonjae Choi<sup>b</sup> and Sung Gap Im<sup>\*a</sup>

<sup>†a</sup>*Department of Chemical and Biomolecular Engineering, Korea Advanced Institute of Science and Technology, Daejeon, 305-701 Korea. E-mail: sgim@kaist.ac.kr*

<sup>b</sup>*Department of Mechanical Engineering, University of Texas at Dallas, Texas, United States*

1. Schematic image of entrapped air pocket (Fig. S1)
2. SEM and EDS mapping images (Fig. S2)
3. Contact angle and SEM images after soaking in acid, base and oxidant (Fig. S3)

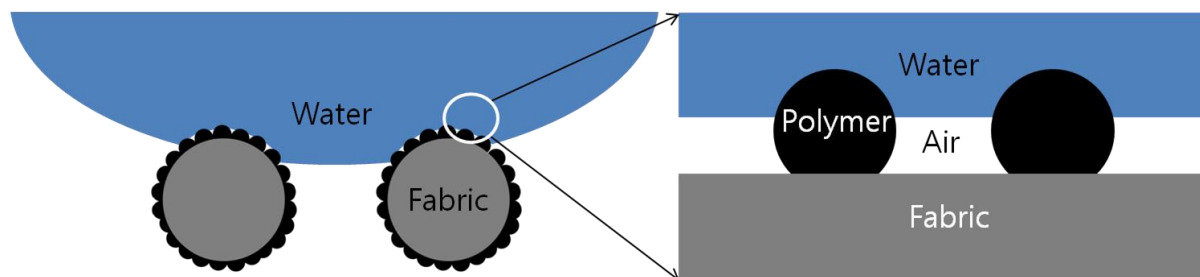

**Fig. S1** A schematic image of entrapped air pocket between the coated fabric and water droplet.

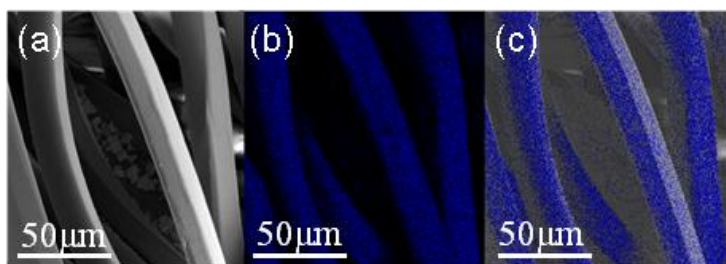

**Fig. S2** (a) SEM image of p(V4D4-L-PFDA) stacked polymer-coated fabric. (b) EDS elemental mapping of fluorine on the same fabric. (c) Merged image of SEM and EDS elemental mapping images.

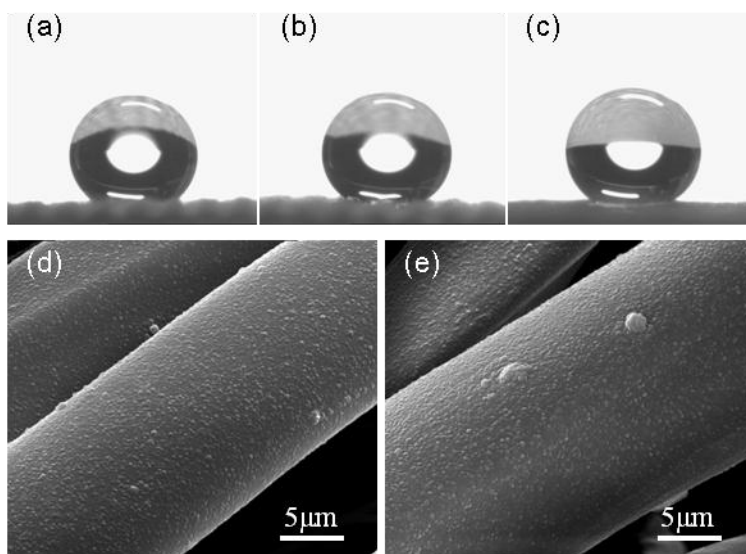

**Fig. S3** (a), (b), (c) Contact angle images of p(V4D4-L-PFDA) coated-polyester fabric after soaking in H<sub>2</sub>SO<sub>4</sub> (pH 2), KOH (pH 12), and H<sub>2</sub>O<sub>2</sub> for a period of 24 hrs, respectively. (d), (e) SEM images of p(V4D4-L-PFDA) polyester fabric after soaking in H<sub>2</sub>SO<sub>4</sub> (pH 2) and KOH (pH 12), respectively.
